# Supplementary material for: Assessing Problematic Social Media Use in Adolescents by Parental Ratings: Development and Validation of the Social Media Disorder Scale for Parents (SMDS-P)
Source: J Clin Med. 2021 Feb 6;10(4):617. doi: 10.3390/jcm10040617 (PMC7914646; doi:10.3390/jcm10040617)
Supplement: Supplementary file 1 [file jcm-10-00617-s001.pdf]

**Table S1.** SMDS-P German Version.

| <b>Hat Ihr Kind im vergangenen Jahr...</b> |                                                                                                                           |                                                           |
|--------------------------------------------|---------------------------------------------------------------------------------------------------------------------------|-----------------------------------------------------------|
| 1.                                         | schon mal stundenlang an nichts anderes denken können, als an den Moment an dem er/sie wieder soziale Medien nutzen kann? | <input type="checkbox"/> Nein <input type="checkbox"/> Ja |
| 2.                                         | sich unzufrieden gefühlt, weil er/sie soziale Medien häufiger nutzen wollte?                                              | <input type="checkbox"/> Nein <input type="checkbox"/> Ja |
| 3.                                         | sich unglücklich gefühlt, wenn er/sie soziale Medien nicht nutzen konnte?                                                 | <input type="checkbox"/> Nein <input type="checkbox"/> Ja |
| 4.                                         | die Nutzung sozialer Medien nicht verringern können, während andere ihm/ihr sagten, dass er/sie das dringend tun muss?    | <input type="checkbox"/> Nein <input type="checkbox"/> Ja |
| 5.                                         | soziale Medien genutzt, um nicht an unangenehme Dinge denken zu müssen?                                                   | <input type="checkbox"/> Nein <input type="checkbox"/> Ja |
| 6.                                         | Streit mit anderen gehabt, durch sein/ihr Nutzungsverhalten?                                                              | <input type="checkbox"/> Nein <input type="checkbox"/> Ja |
| 7.                                         | die Zeit, die er/sie sozialen Medien gewidmet hat, vor anderen geheim gehalten?                                           | <input type="checkbox"/> Nein <input type="checkbox"/> Ja |
| 8.                                         | kein Interesse an Hobbys oder anderen Aktivitäten gezeigt, weil er/sie lieber soziale Medien nutzen wollte?               | <input type="checkbox"/> Nein <input type="checkbox"/> Ja |
| 9.                                         | ernsthafte Probleme mit der Familie, Freunden oder dem Partner durch die Nutzung sozialer Medien gehabt?                  | <input type="checkbox"/> Nein <input type="checkbox"/> Ja |

Notes: SMDS-P = Social Media Disorder Scale - Parental Version in original German language.

**Table S2.** Inter-item correlation SMDS-P.<sup>a</sup>

|               | <b>Item 1</b> | <b>Item 2</b> | <b>Item 3</b> | <b>Item 4</b> | <b>Item 5</b> | <b>Item 6</b> | <b>Item 7</b> | <b>Item 8</b> | <b>Item 9</b> |
|---------------|---------------|---------------|---------------|---------------|---------------|---------------|---------------|---------------|---------------|
| <b>Item 1</b> | 1.00          |               |               |               |               |               |               |               |               |
| <b>Item 2</b> | 0.55          | 1.00          |               |               |               |               |               |               |               |
| <b>Item 3</b> | 0.54          | 0.57          | 1.00          |               |               |               |               |               |               |
| <b>Item 4</b> | 0.39          | 0.26          | 0.26          | 1.00          |               |               |               |               |               |
| <b>Item 5</b> | 0.33          | 0.34          | 0.34          | 0.29          | 1.00          |               |               |               |               |
| <b>Item 6</b> | 0.44          | 0.41          | 0.40          | 0.30          | 0.35          | 1.00          |               |               |               |
| <b>Item 7</b> | 0.43          | 0.40          | 0.40          | 0.33          | 0.41          | 0.43          | 1.00          |               |               |
| <b>Item 8</b> | 0.39          | 0.41          | 0.41          | 0.29          | 0.38          | 0.40          | 0.38          | 1.00          |               |
| <b>Item 9</b> | 0.43          | 0.41          | 0.43          | 0.36          | 0.43          | 0.39          | 0.49          | 0.41          | 1.00          |

Notes: SMDS-P = Social Media Disorder Scale – Parental Version, <sup>a</sup> Item descriptions are presented in Table 1.

**Table S3.** Relative item-response frequency of the SMDS-P.

| SMDS-P Item <sup>a</sup> | Response   |
|--------------------------|------------|
|                          | <b>Yes</b> |
| Item 1                   | 0.26       |
| Item 2                   | 0.25       |
| Item 3                   | 0.27       |
| Item 4                   | 0.19       |
| Item 5                   | 0.30       |
| Item 6                   | 0.26       |
| Item 7                   | 0.17       |
| Item 8                   | 0.29       |
| Item 9                   | 0.18       |

Notes: SMDS-P = Social Media Disorder Scale – Parental Version, <sup>a</sup> Item descriptions are presented in Table 1.
